# Supplementary material
Source: publisher site journal article supplement (https://www.dovepress.com/article/301892)
Supplement: Supplementary file 1 [file get_supplementary_file.php]

SUPPORTING INFORMATION

[Guoxin Jing] et al

**Layer-Number-Dependent Effects of Graphene Oxide on the Pluripotency of Mouse Embryonic Stem Cells Through the Regulation of the Interaction Between the Extracellular Matrix and Integrins**

Guoxin Jing,1 Kun Li,1 Feiyue Sun, 1 Jintong Niu, 1 Rongrong Zhu,1 Yechang Qian*,2 and Shilong Wang*.1

1 Research Center for Translational Medicine at East Hospital, School of Life Science and Technology, Tongji University, Shanghai, P. R. China;

2 Department of Respiratory Disease, Baoshan District Hospital of Integrated Traditional Chinese and Western Medicine, Shanghai, P. R. China.

Correspondence: Yechang Qian* and Shilong Wang*

Tel +86 2165918108 Fax +86 2136070892, Email: [qianyechang@163.com](mailto:qianyechang@163.com)

Tel +86 2165982595 Fax +86 2165982595, Email: wsl@tongji.edu.cn


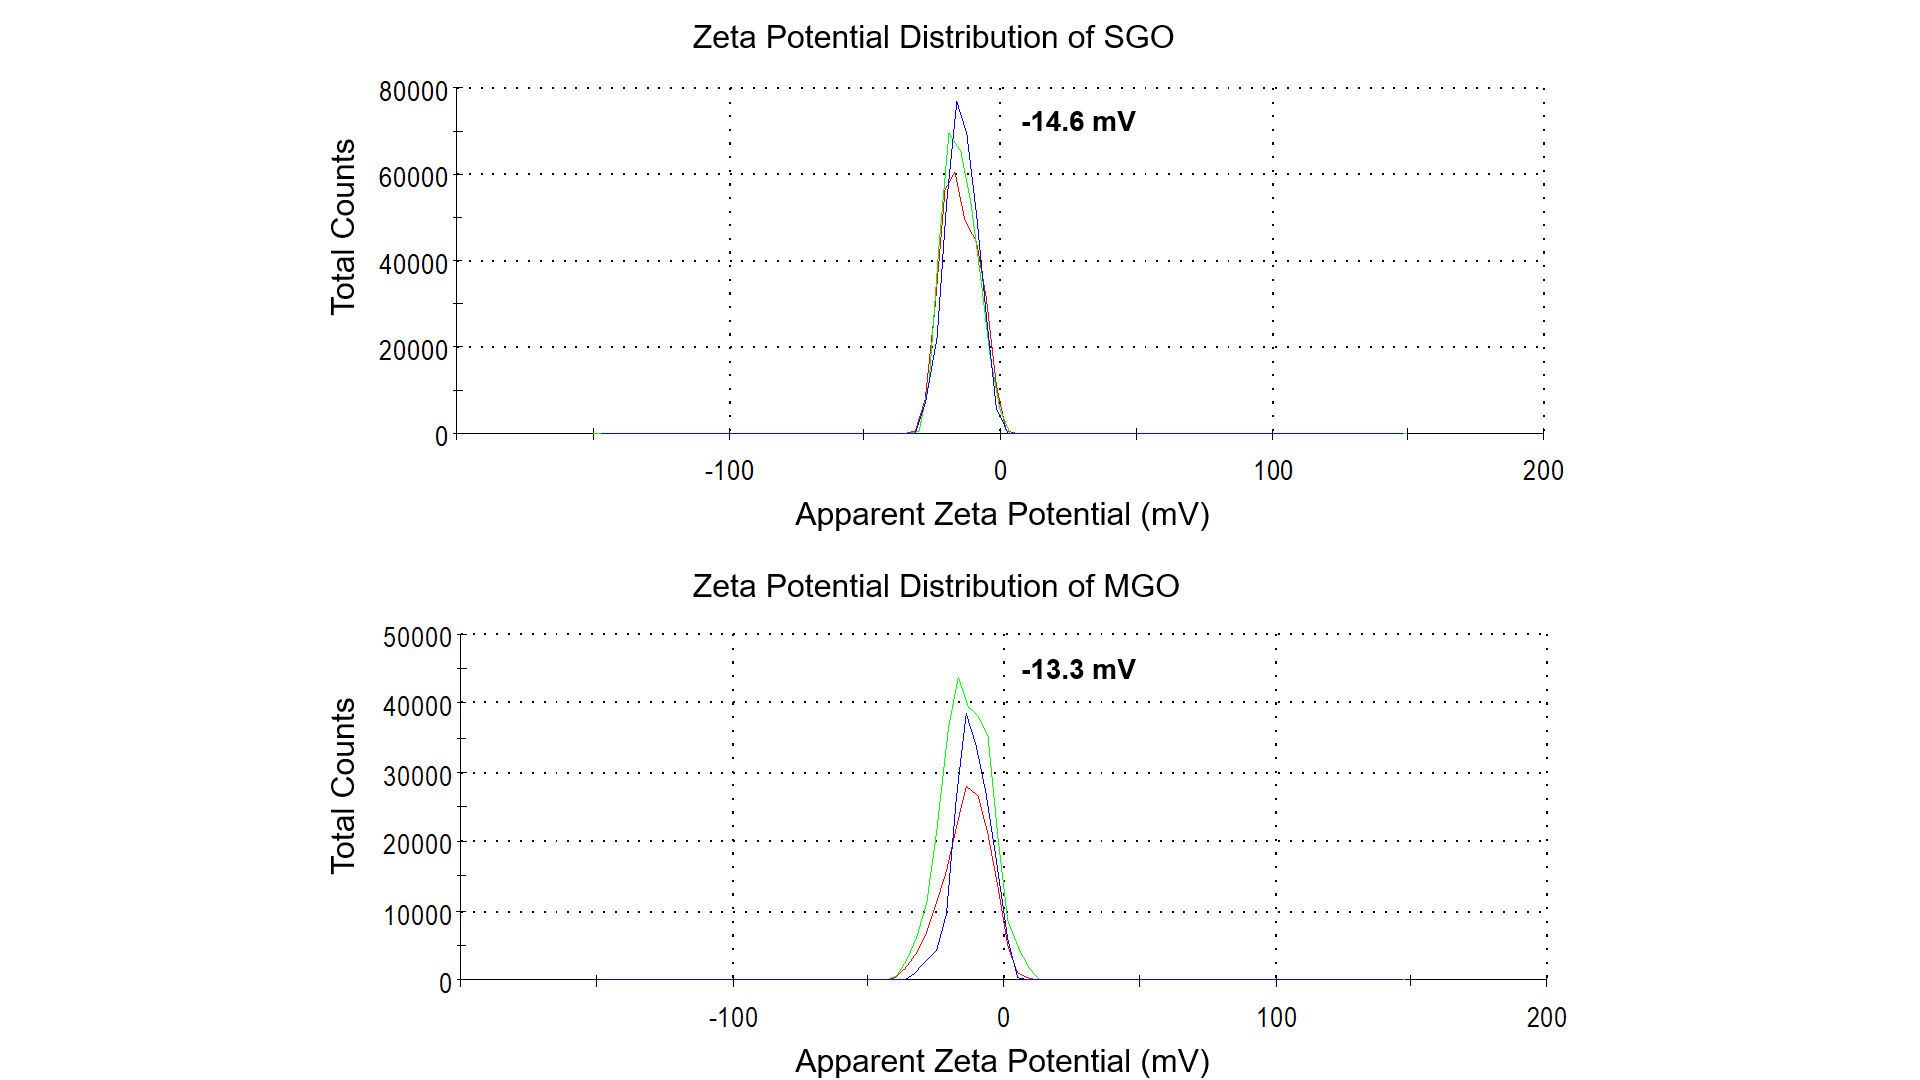


**Figure S1.** Zeta potential distribution of SGO and MGO. Each sample was repeated three times and take the average.


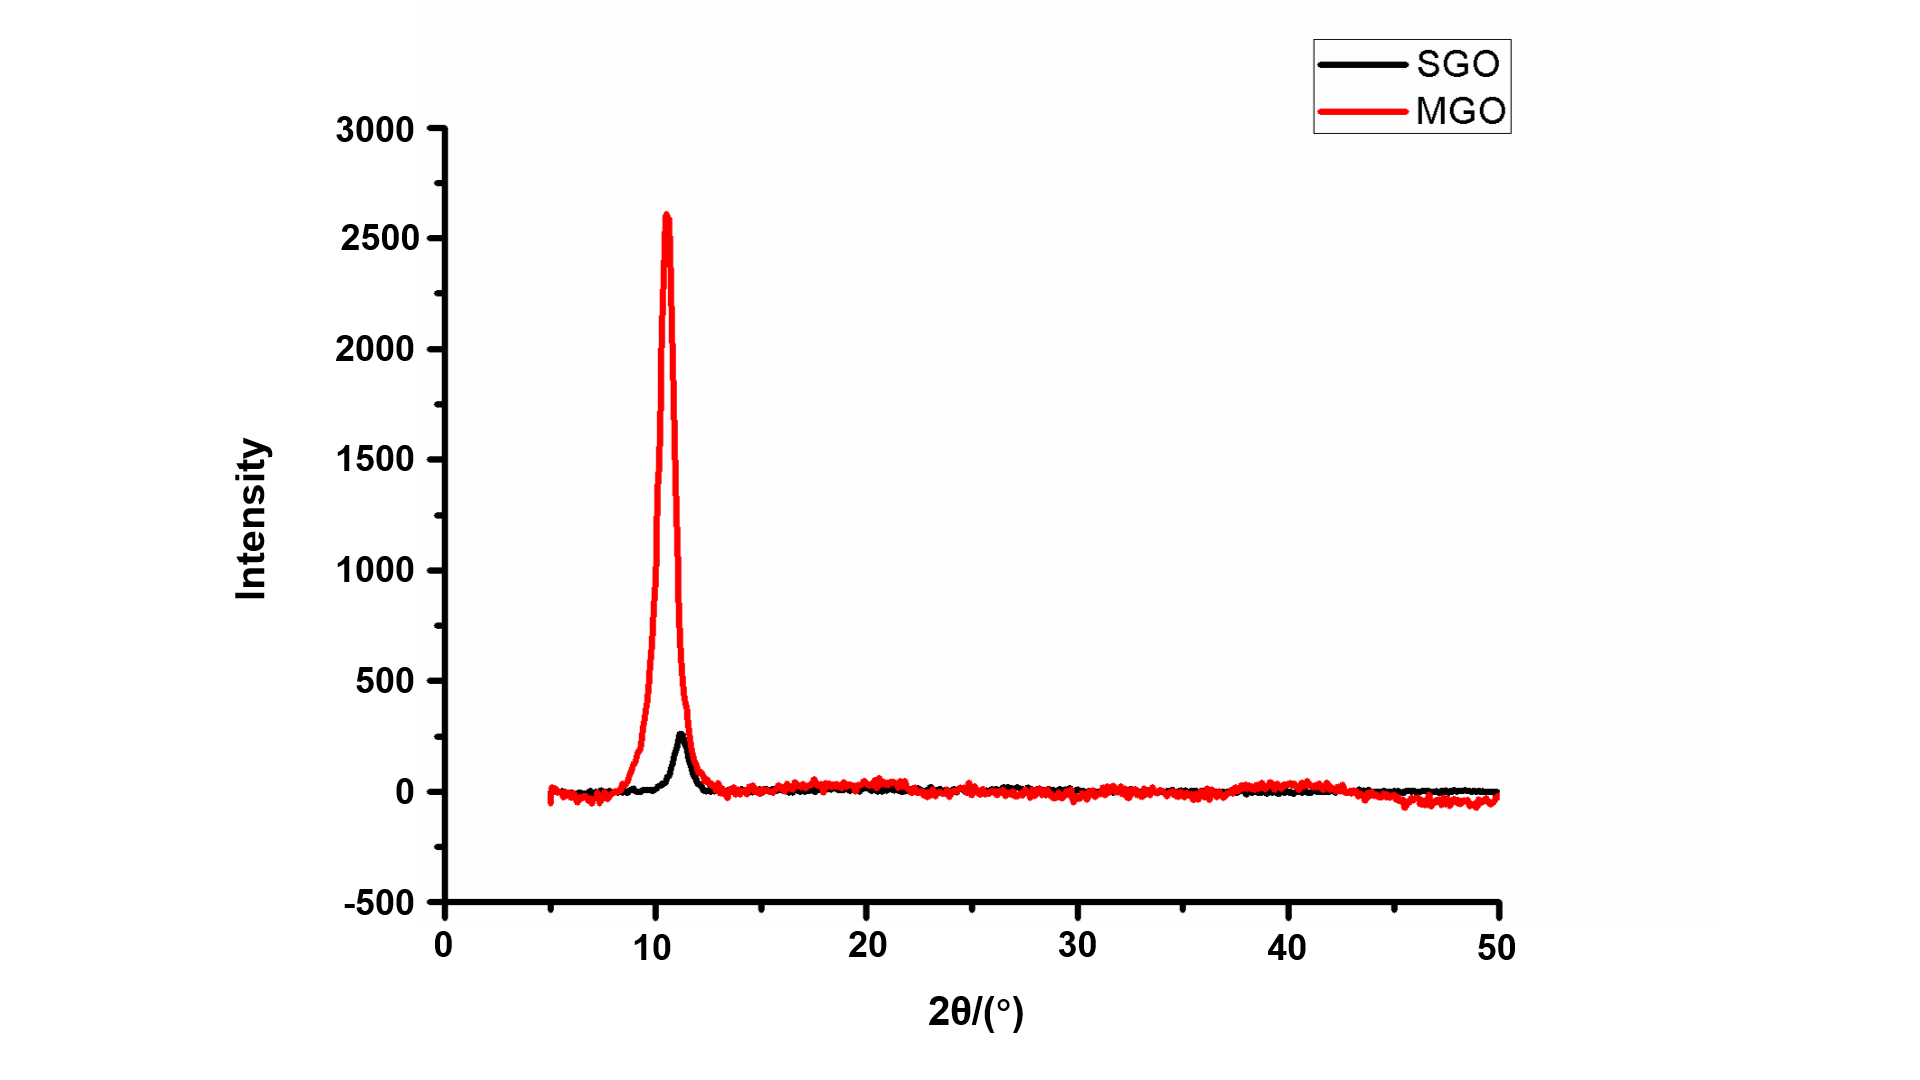


**Figure S2.** XRD pattern of SGO (black line) and MGO (red line).


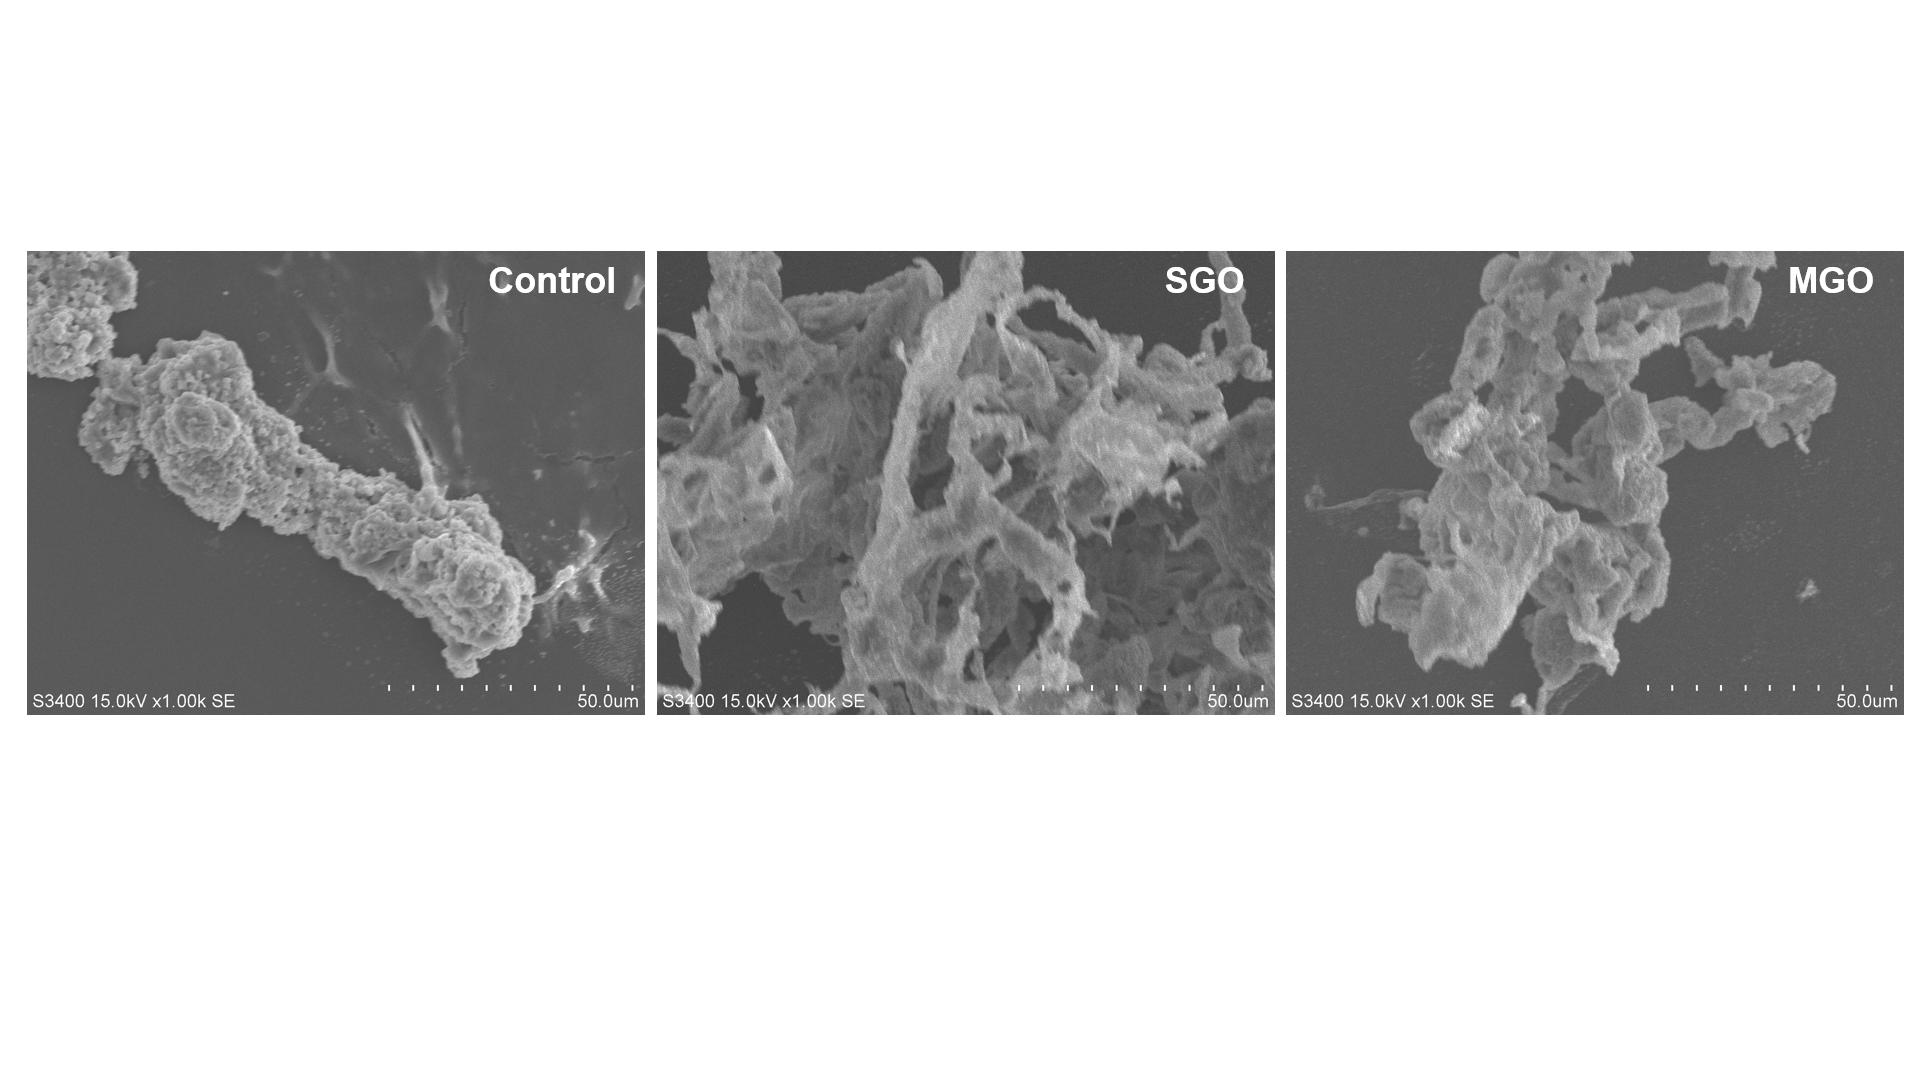


**Figure S3.** Scanning electron microscopy (SEM) detect the interaction between SGO/MGO and mESCs after co-incubated for 16 h.


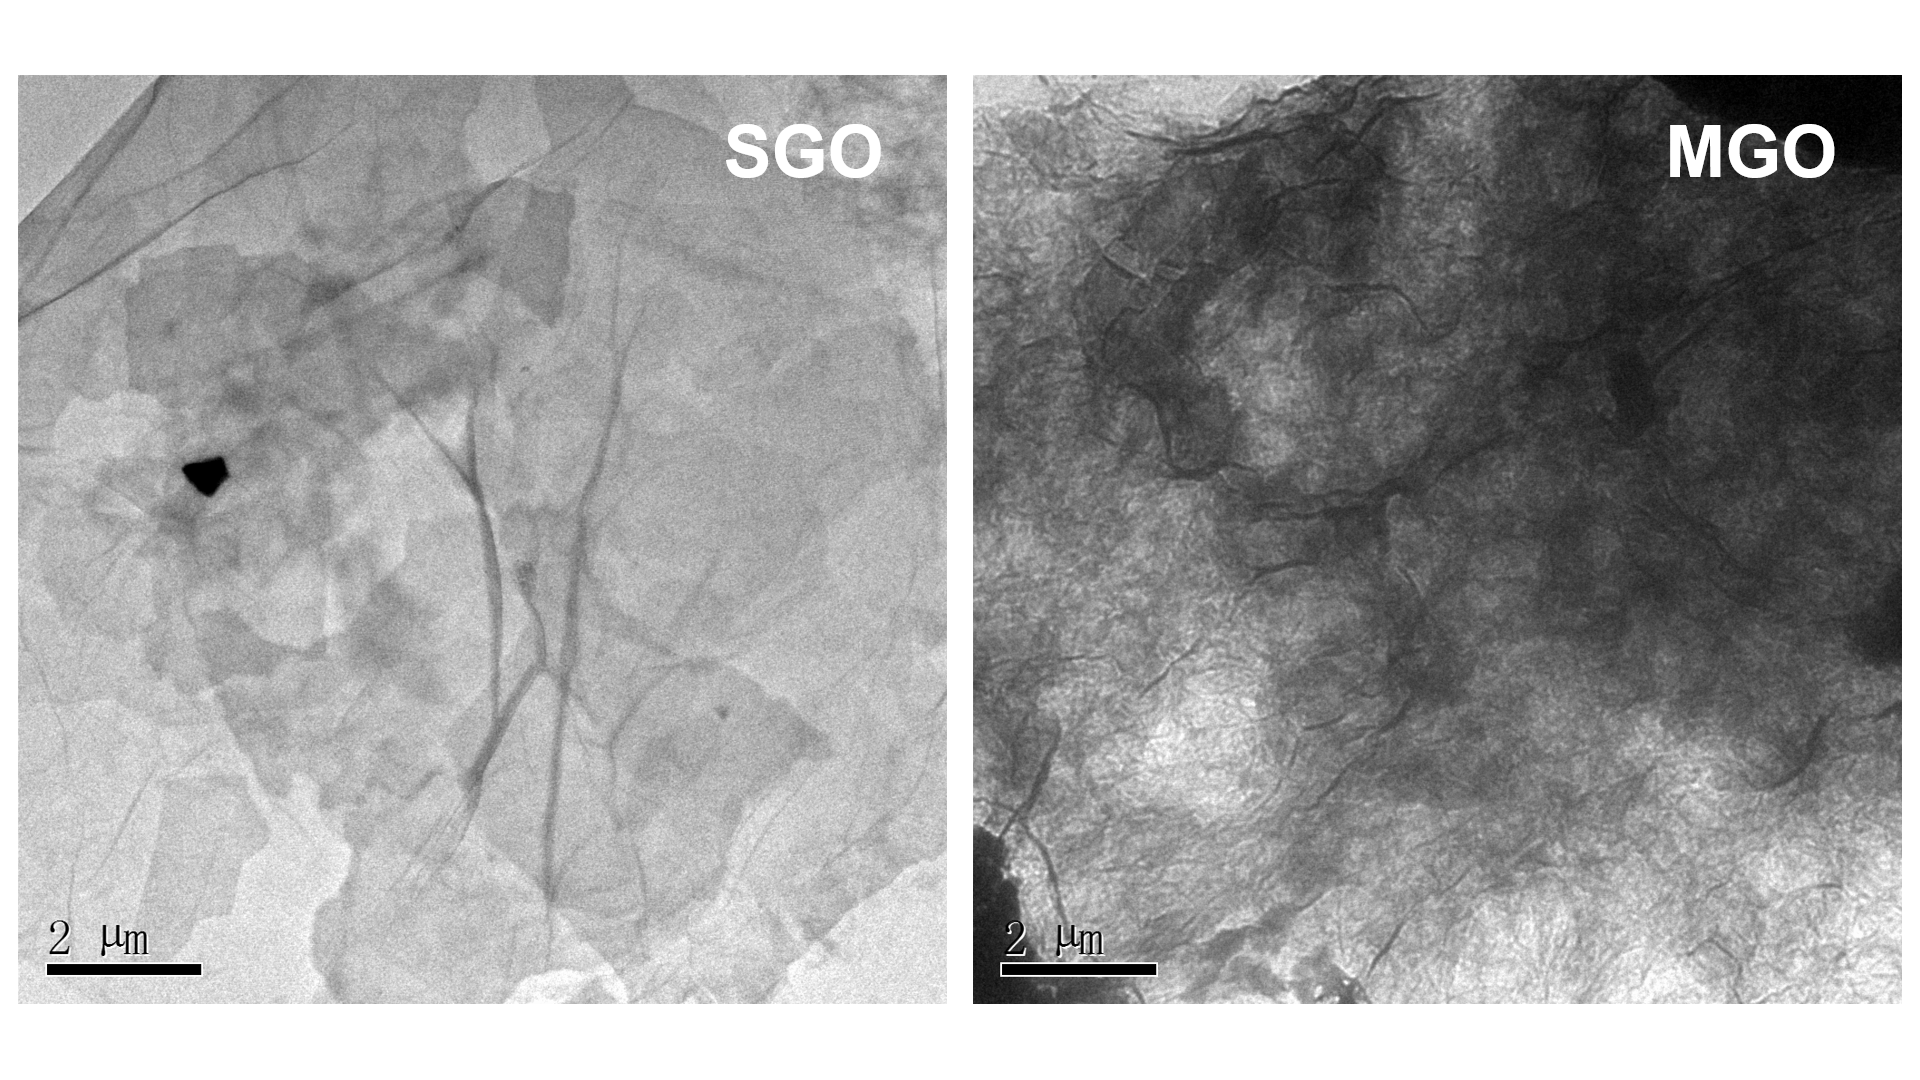


**Figure S4.** The TEM detection of the binding ability between SGO/MGO and Fibronectin.
